# Supplementary material for: Experiences drying hirakaku beams in a vacuum radio-frequency kiln
Source: MDPI journal article supplement (doi:10.3390/genes13122279), 2001-01-01
Supplement: s1 [file s1]

## SUPPLEMENTARY MATERIAL

### RESULTS

#### Dataset 4 Cotton

The NRMSE of traits LEN and STR were denoted as the NRMSE\_LEN and NRMSE\_STR respectively. As seen in **Table S1**, in terms of NRMSE for the LEN trait, the best performance under BO strategy was in environments BK (0.859) and CO (0.813), while under the GrS strategy it was in environment SG (0.855), and under the NT strategy in environments BR (0.895), DD (0.914), EM (0.829), MV (0.832) and Global (0.788).

For the STR trait, the best predictions (lower NRMSE) were observed under the GrS strategy [BK (0.63), BR (0.55), CO (0.807), DD (0.986), EM (0.601), MV (0.691), SG (0.558)], with the exception in Global (across environments) where the lowest NRMSE was 0.663 under the BO strategy. More details are provided in **Table S1**. Standard error of prediction performance for every environment and across environments (Global) are provided in **Table S2**.

Across traits the prediction performance can be observed in **Figure S1A**, where the best predictions (lower NRMS) can be found under the BO and GrS strategies and the worst under the NT strategy. Across traits we can observe that the RE of comparing the NT strategy versus BO strategy for each environment and across environments were 1.022 (BK), 1.016 (BR), 1.019 (CO), 1.007 (DD), 1.035 (EM), 1.028 (MV), 1.05 (SG) and 1.019 (Global) (**Figure S1\_B**). This indicates that the BO method outperformed NT strategy in terms of NRMSE in all environments by 2.2% (BK), 1.6% (BR), 1.9% (CO), 0.7% (DD), 3.5% (EM), 2.8% (MV), 5% (SG) and 1.9% (Global). While the RE of comparing the NT strategy versus GrS strategy for each environment and across environments was 1.02 (BK), 1.02 (BR), 1.008 (CO), 1.009 (DD), 1.044 (EM), 1.03 (MV), 1.06 (SG) and 1.021 (Global) (**Figure S1B**). This indicates that the GrS method outperformed NT strategy in terms of NRMSE in all the environments mentioned by 2.0% (BK), 2.0% (BR), 0.8% (CO), 0.9% (DD), 4.4% (EM), 3% (MV), 6% (SG) and 2.1% (Global). Finally, the RE of comparing the GrS method versus the BO method was 1.002 (BK), 0.996 (BR), 1.01 (CO), 0.998 (DD), 0.997 (EM), 0.997 (MV), 0.99 (SG)

and 0.997 (Global) (**Figure S1B**). This means that the BO strategy is slightly worst in terms of prediction performance than the GrS method since the RE in most cases was less than one. For details see **Table S1**.

The prediction performance in terms of NRMSE of each trait across environments are given in **Figure S1C** and the relative efficiencies of comparing NT versus BO, NT versus GrS and GrS and BO are given in **Figure S1D**, where we BO and GrS were the best strategies for tuning and NT the worst. Also, no relevant differences between the BO and GrS methods were observed.

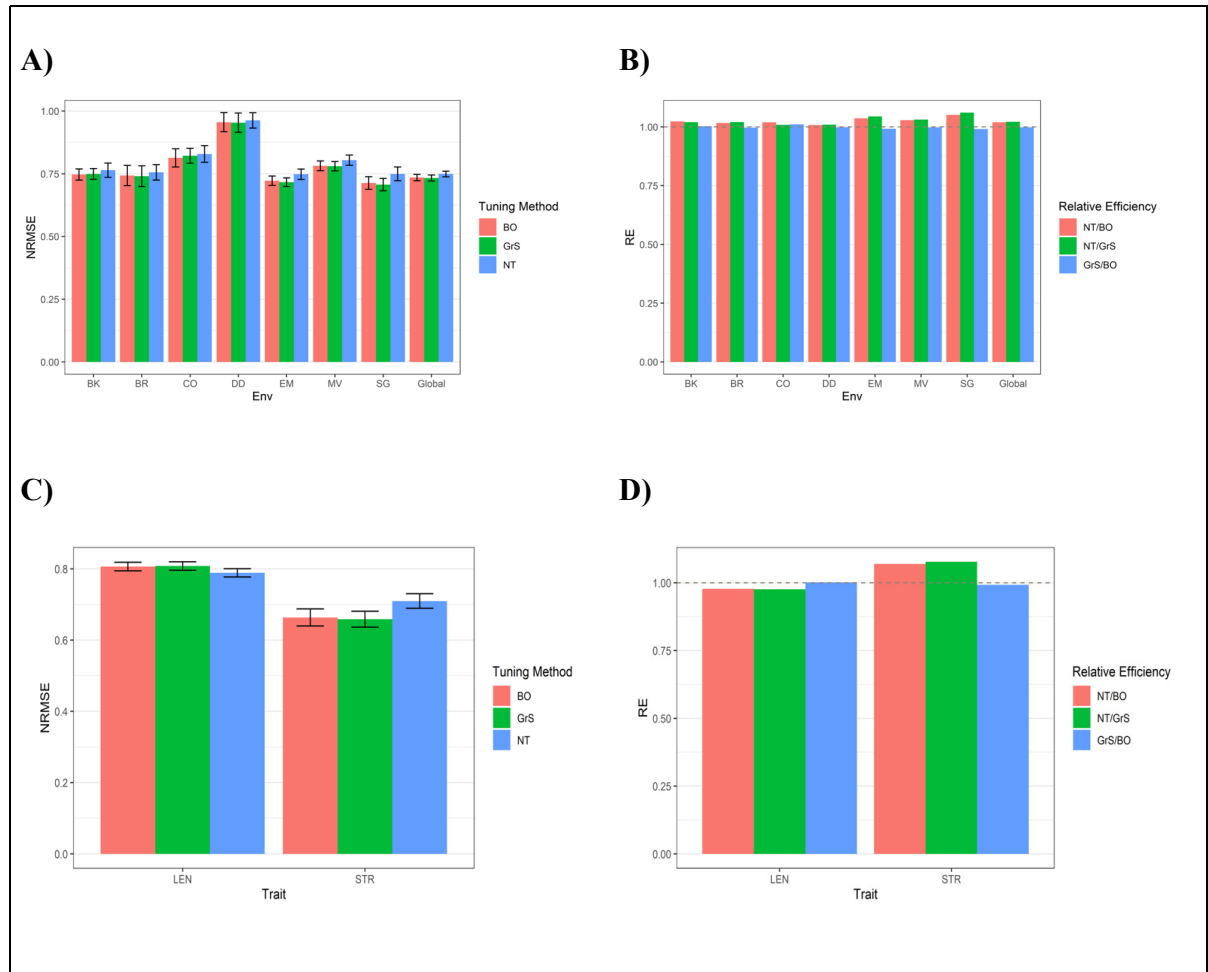

**Figure S1. Data set 4 Cotton.** **A)** Prediction performance in terms of Normalized root mean squared error (NRMSE) for each environment (BK, BR, CO, DD, EM, MV and SG), across environments (Global) and across traits (LEN and STR) with three tuning strategies (BO, GrS and NT) under 7 Fold Cross-Validation (7FCV). **B)** Relative efficiency for each environment (BK, BR, CO, DD, EM, MV and SG), across environments (Global) and across traits with three tuning strategies (BO, GrS and NT) under 7-Fold Cross-Validation (7FCV). **C)** Prediction performance in terms of Normalized root mean squared error (NRMSE) for each trait (LEN and STR) across environments with three tuning strategies (BO, GrS and NT) under 7 Fold Cross-Validation (7FCV). **D)** Relative efficiency for each trait (LEN and STR) across environments with three tuning strategies (BO, GrS and NT) under 7 Fold Cross-Validation (7FCV). When RE > 1 the denominator method outperforms the numerator in terms of prediction performance.

**Table S1.** Prediction performance for every environment and across environments (Global) of the **dataset 4 (Cotton)** in terms of Normalized Root Mean Square Error (NRMSE) under three tuning methods (BO, GrS and NT) for two cotton traits (LEN and STR) data set. RE denotes relative efficiency. The RE in rows corresponding to BO were computed dividing the NRMSE under NT by the NRMSE under BO. While the RE in rows corresponding to GrS were computed dividing the NRMSE under NT by the NRMSE under GrS. While those RE in the rows corresponding to NT strategy were computed dividing the NRMSE under GrS by the NRMSE under BO

| Tuning Type           | Environment | NRMSE_LEN | NRMSE_STR | NRMSE   | RE        |
|-----------------------|-------------|-----------|-----------|---------|-----------|
| Bayesian Optimization | BK          | 0.8598    | 0.6343    | 0.74705 | 1.0228900 |
| Bayesian Optimization | BR          | 0.9241    | 0.5620    | 0.74305 | 1.0165534 |
| Bayesian Optimization | CO          | 0.8131    | 0.8136    | 0.81335 | 1.0190570 |
| Bayesian Optimization | DD          | 0.9240    | 0.9867    | 0.95535 | 1.0076935 |
| Bayesian Optimization | EM          | 0.8324    | 0.6120    | 0.72220 | 1.0358626 |
| Bayesian Optimization | MV          | 0.8652    | 0.6984    | 0.78180 | 1.0283960 |
| Bayesian Optimization | SG          | 0.8554    | 0.5709    | 0.71315 | 1.0507607 |
| Bayesian Optimization | Global      | 0.8064    | 0.6634    | 0.73490 | 1.0192543 |
| Grid Search           | BK          | 0.8676    | 0.6306    | 0.74910 | 1.0200908 |
| Grid Search           | BR          | 0.9301    | 0.5504    | 0.74025 | 1.0203985 |
| Grid Search           | CO          | 0.8357    | 0.8076    | 0.82165 | 1.0087629 |
| Grid Search           | DD          | 0.9211    | 0.9862    | 0.95365 | 1.0094899 |
| Grid Search           | EM          | 0.8305    | 0.6019    | 0.71620 | 1.0445406 |
| Grid Search           | MV          | 0.8683    | 0.6917    | 0.78000 | 1.0307692 |
| Grid Search           | SG          | 0.8552    | 0.5582    | 0.70670 | 1.0603509 |

**Table S1.** Prediction performance for every environment and across environments (Global) of the **dataset 4 (Cotton)** in terms of Normalized Root Mean Square Error (NRMSE) under three tuning methods (BO, GrS and NT) for two cotton traits (LEN and STR) data set. RE denotes relative efficiency. The RE in rows corresponding to BO were computed dividing the NRMSE under NT by the NRMSE under BO. While the RE in rows corresponding to GrS were computed dividing the NRMSE under NT by the NRMSE under GrS. While those RE in the rows corresponding to NT strategy were computed dividing the NRMSE under GrS by the NRMSE under BO

| Tuning Type | Environment | NRMSE_LEN | NRMSE_STR | NRMSE   | RE        |
|-------------|-------------|-----------|-----------|---------|-----------|
| Grid Search | Global      | 0.8078    | 0.6585    | 0.73315 | 1.0216872 |
| NoTuning    | BK          | 0.8623    | 0.6660    | 0.76415 | 1.0027441 |
| NoTuning    | BR          | 0.8953    | 0.6154    | 0.75535 | 0.9962317 |
| NoTuning    | CO          | 0.8254    | 0.8323    | 0.82885 | 1.0102047 |
| NoTuning    | DD          | 0.9149    | 1.0105    | 0.96270 | 0.9982205 |
| NoTuning    | EM          | 0.8299    | 0.6663    | 0.74810 | 0.9916921 |
| NoTuning    | MV          | 0.8321    | 0.7759    | 0.80400 | 0.9976976 |
| NoTuning    | SG          | 0.8689    | 0.6298    | 0.74935 | 0.9909556 |
| NoTuning    | Global      | 0.7886    | 0.7095    | 0.74905 | 0.9976187 |

**Table S2.** Standard error of prediction performance for every environment and across environments (Global) of two traits (LEN and STR) for the **dataset 4 (Cotton)** in terms of Normalized Root Mean Square Error (NRMSE) under three methods of tuning (BO, GrS and NT). RE denotes relative efficiency.

| Tuning Type           | Environment | NRMSE_SE_LEN | NRMSE_SE_STR | NRMSE_SE |
|-----------------------|-------------|--------------|--------------|----------|
| Bayesian Optimization | BK          | 0.0168       | 0.0458       | 0.015650 |
| Bayesian Optimization | BR          | 0.0878       | 0.0263       | 0.028525 |
| Bayesian Optimization | CO          | 0.0301       | 0.0726       | 0.025675 |
| Bayesian Optimization | DD          | 0.0205       | 0.0875       | 0.027000 |
| Bayesian Optimization | EM          | 0.0168       | 0.0354       | 0.013050 |
| Bayesian Optimization | MV          | 0.0144       | 0.0405       | 0.013725 |
| Bayesian Optimization | SG          | 0.0256       | 0.0452       | 0.017700 |
| Bayesian Optimization | Global      | 0.0120       | 0.0238       | 0.008950 |
| Grid Search           | BK          | 0.0147       | 0.0461       | 0.015200 |
| Grid Search           | BR          | 0.0890       | 0.0285       | 0.029375 |
| Grid Search           | CO          | 0.0156       | 0.0681       | 0.020925 |
| Grid Search           | DD          | 0.0184       | 0.0904       | 0.027200 |
| Grid Search           | EM          | 0.0173       | 0.0320       | 0.012325 |
| Grid Search           | MV          | 0.0164       | 0.0370       | 0.013350 |
| Grid Search           | SG          | 0.0264       | 0.0436       | 0.017500 |
| Grid Search           | Global      | 0.0117       | 0.0226       | 0.008575 |
| No Tuning             | BK          | 0.0327       | 0.0481       | 0.020200 |

**Table S2.** Standard error of prediction performance for every environment and across environments (Global) of two traits (LEN and STR) for the **dataset 4 (Cotton)** in terms of Normalized Root Mean Square Error (NRMSE) under three methods of tuning (BO, GrS and NT). RE denotes relative efficiency.

| Tuning Type | Environment | NRMSE_SE_LEN | NRMSE_SE_STR | NRMSE_SE |
|-------------|-------------|--------------|--------------|----------|
| No Tuning   | BR          | 0.0655       | 0.0218       | 0.021825 |
| No Tuning   | CO          | 0.0155       | 0.0787       | 0.023550 |
| No Tuning   | DD          | 0.0246       | 0.0617       | 0.021575 |
| No Tuning   | EM          | 0.0277       | 0.0304       | 0.014525 |
| No Tuning   | MV          | 0.0125       | 0.0448       | 0.014325 |
| No Tuning   | SG          | 0.0308       | 0.0468       | 0.019400 |
| No Tuning   | Global      | 0.0116       | 0.0206       | 0.008050 |

### Dataset 5 Disease

Here we denote NRMSE\_PTR, NRMSE\_SB and NRMSE\_SN the NRMSE of traits PTR, SB and SN respectively. As shown in **Table S3**. in terms of NRMSE for the PTR trait, the best performance under the GrS strategy was observed in environments Env1 (0.857), Env4 (0.853), Env5 (0.854), Env6 (0.863) and Global (0.826), while the environment with the best NRMSE under the BO strategy was Env2 (0.867) and under NT strategy was Env3 (0.844). For trait SB, the best NRMSE values were observed under the GrS strategy in environments Env1 (0.844), Env2 (0.838), Env3 (0.811), Env4 (0.857), Env5 (0.849), Env6 (0.846) and Global (0.817). For trait SN, the best predictions (lower NRMSE) were observed under the GrS strategy [Env1 (0.763), Env3 (0.758), Env4 (0.69), Env5 (0.796) and Global (0.712)], except in the case of Env2 and Env6 were best NRMSE values were 0.76 and 0.737 under the BO strategy. Standard error of prediction performance for every environment and across environments (Global) are provided in **Table S4**.

Summarizing across traits for each environment shows in **Figure S2A** that the best predictions (lower NRMS) were observed under the BO and GrS strategies and the worst

under the NT strategy. Across traits we can also observe that the RE of comparing the NT strategy versus BO strategy for each environment and across environments were 1.021 (Env1), 1.023 (Env2), 1.024 (Env3), 1.02 (Env4), 1.022 (Env5), 1.033 (Env6) and 1.023 (Global) (**Figure S2B**). This indicates that the BO method outperformed NT strategy in terms of NRMSE in all environments by 2.1% (Env1), 2.3% (Env2), 2.4% (Env3), 2% (Env4), 2.2% (Env5), 3.3% (Env6) and 2.3% (Global). While the RE of comparing the NT strategy versus GrS strategy for each environment and across environments were 1.023 (Env1), 1.025 (Env2), 1.024 (Env3), 1.026 (Env4), 1.039 (Env5), 1.029 (Env6) and 1.027 (Global) (**Figure S2\_B**). This indicates that the GrS method outperformed the NT strategy in terms of NRMSE in all the environments mentioned by 2.3% (Env1), 2.5% (Env2), 2.4% (Env3), 2.6% (Env4), 3.9% (Env5), 2.9% (Env6) and 2.7% (Global). Finally, the RE of comparing the GrS method versus the BO method were 0.996 (Env1), 1.000 (Env2), 0.996 (Env3), 0.995 (Env4), 0.994 (Env5), 0.995 (Env6) and 0.996 (Global) (**Figure S2B**). This means that the BO strategy is slightly worse in terms of prediction performance than the GrS method, since the RE in most case was slightly less than one. For more details, see **Table S3**.

The prediction performance in terms of NRMSE of each trait across environments are given in **Figure S2C** and the relative efficiencies of comparing NT versus BO, NT versus GrS and GrS and BO are given in **Figure S2D**, where in all three traits, the tuning strategies of BO and GrS were slightly better than the NT strategy.

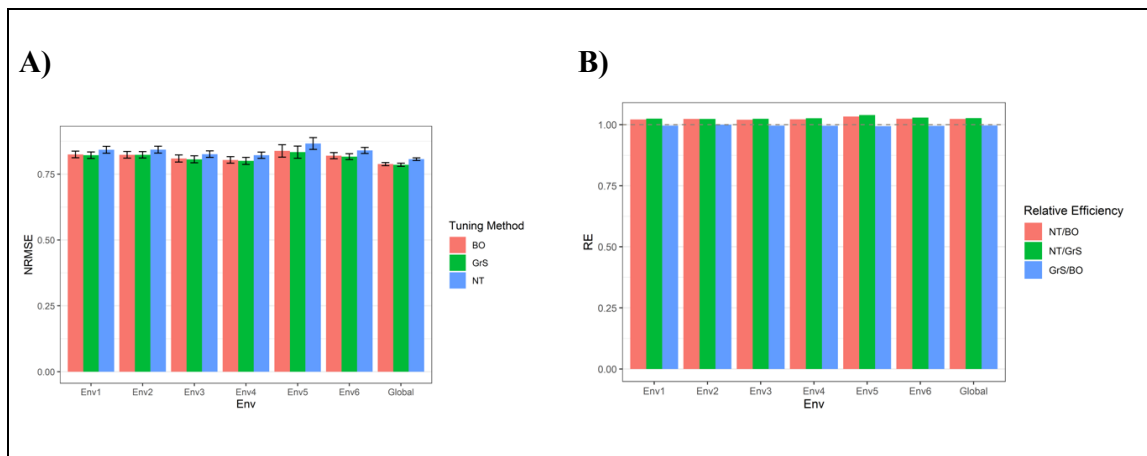



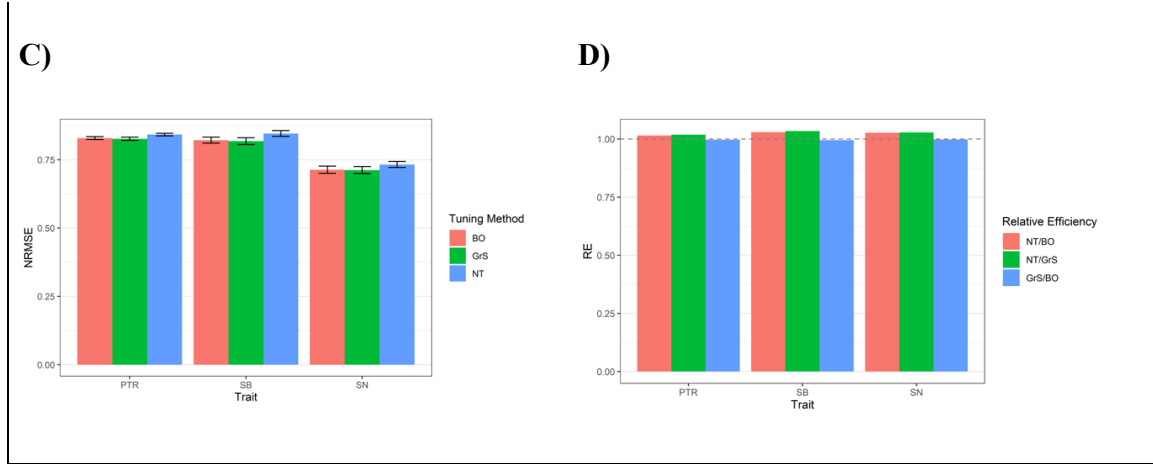

**Figure S2.** **A)** Prediction performance for **Dataset 5 (Disease)** in terms of Normalized root mean squared error (NRMSE) for each environment (Env1, Env2, Env3, Env4, Env5, Env6), across environments (Global) and across traits with three tuning strategies (BO, GrS and NT) under 7-fold cross-validation (7FCV). **B)** Relative efficiency for each environment (Env1, Env2, Env3, Env4, Env5, Env6), across environments (Global) and across traits (PTR, SB and SN) with three tuning strategies (BO, GrS and NT) under 7FCV. **C)** Prediction performance in terms of Normalized root mean squared error (NRMSE) for each trait (PTR, SB and SN) across environments with three tuning strategies (BO, GrS and NT) under 7-fold cross-validation (7FCV). **D)** Relative efficiency for each trait (PTR, SB and SN) across environments with three tuning strategies (PTR, SB and SN) under 7-fold cross-validation (7FCV). When  $RE > 1$  the denominator method outperforms the numerator in terms of prediction performance.

**Table S3.** Prediction performance for every environment and across environments (Global) of the **Dataset 5 (Disease)** in terms of Normalized Root Mean Square Error (NRMSE) under three tuning methods (BO, GrS and NT) and for 3 traits (SB, SN, SE). RE denotes relative efficiency. The RE in rows corresponding to BO were computed dividing the NRMSE under NT by the NRMSE under BO. While the RE in rows corresponding to GrS were computed dividing the NRMSE under NT by the NRMSE under GrS. While those RE in the rows corresponding to NT strategy were computed dividing the NRMSE under GrS by the NRMSE under BO.

| Tuning Type           | Environment | NRMSE_PTR | NRMSE_SB | NRMSE_SN | NRMSE     | RE        |
|-----------------------|-------------|-----------|----------|----------|-----------|-----------|
| Bayesian Optimization | Env1        | 0.8593    | 0.8490   | 0.7660   | 0.8247667 | 1.0213394 |
| Bayesian Optimization | Env2        | 0.8676    | 0.8415   | 0.7602   | 0.8231000 | 1.0239744 |
| Bayesian Optimization | Env3        | 0.8483    | 0.8206   | 0.7589   | 0.8092667 | 1.0202653 |
| Bayesian Optimization | Env4        | 0.8548    | 0.8627   | 0.6939   | 0.8038000 | 1.0222278 |
| Bayesian Optimization | Env5        | 0.8586    | 0.8527   | 0.8030   | 0.8381000 | 1.0336475 |
| Bayesian Optimization | Env6        | 0.8732    | 0.8490   | 0.7374   | 0.8198667 | 1.0244755 |
| Bayesian Optimization | Gbal        | 0.8292    | 0.8216   | 0.7134   | 0.7880667 | 1.0237290 |
| Grid Search           | Env1        | 0.8571    | 0.8446   | 0.7636   | 0.8217667 | 1.0250679 |
| Grid Search           | Env2        | 0.8689    | 0.8389   | 0.7617   | 0.8231667 | 1.0238915 |
| Grid Search           | Env3        | 0.8484    | 0.8116   | 0.7585   | 0.8061667 | 1.0241885 |
| Grid Search           | Env4        | 0.8530    | 0.8574   | 0.6906   | 0.8003333 | 1.0266556 |
| Grid Search           | Env5        | 0.8542    | 0.8493   | 0.7968   | 0.8334333 | 1.0394353 |
| Grid Search           | Env6        | 0.8635    | 0.8468   | 0.7383   | 0.8162000 | 1.0290778 |
| Grid Search           | Global      | 0.8266    | 0.8178   | 0.7121   | 0.7855000 | 1.0270741 |
| No Tuning             | Env1        | 0.8780    | 0.8695   | 0.7796   | 0.8423667 | 0.9963626 |

**Table S3.** Prediction performance for every environment and across environments (Global) of the **Dataset 5 (Disease)** in terms of Normalized Root Mean Square Error (NRMSE) under three tuning methods (BO, GrS and NT) and for 3 traits (SB, SN, SE). RE denotes relative efficiency. The RE in rows corresponding to BO were computed dividing the NRMSE under NT by the NRMSE under BO. While the RE in rows corresponding to GrS were computed dividing the NRMSE under NT by the NRMSE under GrS. While those RE in the rows corresponding to NT strategy were computed dividing the NRMSE under GrS by the NRMSE under BO.

| Tuning Type | Environment | NRMSE_PTR | NRMSE_SB | NRMSE_SN | NRMSE     | RE        |
|-------------|-------------|-----------|----------|----------|-----------|-----------|
| No Tuning   | Env2        | 0.8881    | 0.8694   | 0.7710   | 0.8428333 | 1.0000810 |
| No Tuning   | Env3        | 0.8440    | 0.8614   | 0.7716   | 0.8256667 | 0.9961694 |
| No Tuning   | Env4        | 0.8656    | 0.8841   | 0.7153   | 0.8216667 | 0.9956872 |
| No Tuning   | Env5        | 0.8895    | 0.8716   | 0.8378   | 0.8663000 | 0.9944318 |
| No Tuning   | Env6        | 0.8857    | 0.8775   | 0.7566   | 0.8399333 | 0.9955277 |
| No Tuning   | Global      | 0.8420    | 0.8459   | 0.7324   | 0.8067667 | 0.9967431 |

**Table S4.** Standard error of prediction performance for every environment and across environments (Global) of the **dataset 5 (Disease)** in terms of Normalized Root Mean Square Error (NRMSE) under three methods of tuning (BO, GrS and NT) for three traits (PTR, SB, SN). RE denotes relative efficiency.

| Tuning Type           | Environment | NRMSE_SE_PTR | NRMSE_SE_SB | NRMSE_SE_SN | NRMSE_SE  |
|-----------------------|-------------|--------------|-------------|-------------|-----------|
| Bayesian Optimization | Env1        | 0.0155       | 0.0311      | 0.0187      | 0.0125670 |
| Bayesian Optimization | Env2        | 0.0216       | 0.0166      | 0.0275      | 0.0126440 |
| Bayesian Optimization | Env3        | 0.0158       | 0.0201      | 0.0342      | 0.0134908 |
| Bayesian Optimization | Env4        | 0.0196       | 0.0266      | 0.0187      | 0.0124900 |
| Bayesian Optimization | Env5        | 0.0277       | 0.0321      | 0.0624      | 0.0235174 |

**Table S4.** Standard error of prediction performance for every environment and across environments (Global) of the **dataset 5 (Disease)** in terms of Normalized Root Mean Square Error (NRMSE) under three methods of tuning (BO, GrS and NT) for three traits (PTR, SB, SN). RE denotes relative efficiency.

| Tuning Type           | Environment | NRMSE_SE_PTR | NRMSE_SE_SB | NRMSE_SE_SN | NRMSE_SE  |
|-----------------------|-------------|--------------|-------------|-------------|-----------|
| Bayesian Optimization | Env6        | 0.0271       | 0.0129      | 0.0210      | 0.0117395 |
| Bayesian Optimization | Global      | 0.0055       | 0.0111      | 0.0129      | 0.0056773 |
| Grid Search           | Env1        | 0.0147       | 0.0306      | 0.0186      | 0.0122976 |
| Grid Search           | Env2        | 0.0213       | 0.0147      | 0.0268      | 0.0120859 |
| Grid Search           | Env3        | 0.0161       | 0.0191      | 0.0334      | 0.0132021 |
| GridSearch            | Env4        | 0.0203       | 0.0274      | 0.0211      | 0.0132406 |
| Grid Search           | Env5        | 0.0278       | 0.0323      | 0.0596      | 0.0230363 |
| GridSearch            | Env6        | 0.0248       | 0.0121      | 0.0218      | 0.0112968 |
| Grid Search           | Global      | 0.0061       | 0.0126      | 0.0128      | 0.0060622 |
| No Tuning             | Env1        | 0.0184       | 0.0297      | 0.0195      | 0.0130096 |
| No Tuning             | Env2        | 0.0239       | 0.0135      | 0.0301      | 0.0129904 |
| No Tuning             | Env3        | 0.0173       | 0.0196      | 0.0274      | 0.0123745 |
| No Tuning             | Env4        | 0.0169       | 0.0267      | 0.0179      | 0.0118357 |
| No Tuning             | Env5        | 0.0277       | 0.0342      | 0.0538      | 0.0222665 |
| No Tuning             | Env6        | 0.0278       | 0.0097      | 0.0214      | 0.0113353 |
| No Tuning             | Global      | 0.0048       | 0.0106      | 0.0110      | 0.0050807 |
